# Extending prematuration with cAMP modulators enhances the cumulus contribution to oocyte antioxidant defence and oocyte quality via gap junctions

H.J. Li<sup>1,2</sup>, M.L. Sutton-McDowall<sup>1,3</sup>, X. Wang<sup>1</sup>, S. Sugimura<sup>1,4</sup>,  
J.G. Thompson<sup>1,3</sup>, and R.B. Gilchrist<sup>1,5,\*</sup>

<sup>1</sup>Robinson Research Institute & School of Medicine, The University of Adelaide, Adelaide SA 5005, Australia <sup>2</sup>College of Veterinary Medicine, Inner Mongolia Agricultural University, Hohhot 010018, China <sup>3</sup>Australian Research Council Centre of Excellence for Nanoscale BioPhotonics, Adelaide, Australia <sup>4</sup>Department of Biological Production, Institute of Agriculture, Tokyo University of Agriculture and Technology, Tokyo 183-8509, Japan <sup>5</sup>Discipline of Obstetrics & Gynaecology, School of Women's & Children's Health, University of New South Wales, Sydney 2013, Australia

\*Correspondence address. E-mail: r.gilchrist@unsw.edu.au

Submitted on October 21, 2015; resubmitted on December 10, 2015; accepted on January 11, 2016

**STUDY QUESTION:** Can bovine oocyte antioxidant defence and oocyte quality be improved by extending the duration of pre-*in vitro* maturation (IVM) with cyclic adenosine mono-phosphate (cAMP) modulators?

**SUMMARY ANSWER:** Lengthening the duration of cAMP-modulated pre-IVM elevates intra-oocyte reduced glutathione (GSH) content and reduces hydrogen peroxide (H<sub>2</sub>O<sub>2</sub>) via increased cumulus cell-oocyte gap-junctional communication (GJC), associated with an improvement in subsequent embryo development and quality.

**WHAT IS KNOWN ALREADY:** Oocytes are susceptible to oxidative stress and the oocyte's most important antioxidant glutathione is supplied, at least in part, by cumulus cells. A temporary inhibition of spontaneous meiotic resumption in oocytes can be achieved by preventing a fall in cAMP, and cyclic AMP-modulated pre-IVM maintains cumulus-oocyte GJC and improves subsequent embryo development.

**STUDY DESIGN, SIZE, DURATION:** This study consisted of a series of 10 experiments using bovine oocytes *in vitro*, each with multiple replicates. A range of pre-IVM durations were examined as the key study treatments which were compared with a control. The study was designed to examine if one of the oocyte's major antioxidant defences can be enhanced by pre-IVM with cAMP modulators, and to examine the contribution of cumulus-oocyte GJC on these processes.

**PARTICIPANTS/MATERIALS, SETTING, METHODS:** Immature bovine cumulus-oocyte complexes were treated *in vitro* without (control) or with the cAMP modulators; 100 µM forskolin (FSK) and 500 µM 3-isobutyl-1-methylxanthine (IBMX), for 0, 2, 4 or 6 h (pre-IVM phase) prior to IVM. Oocyte developmental competence was assessed by embryo development and quality post-IVM/IVF. Cumulus-oocyte GJC, intra-oocyte GSH and H<sub>2</sub>O<sub>2</sub> were quantified at various time points during pre-IVM and IVM, in the presence and the absence of functional inhibitors: carbenoxolone (CBX) to block GJC and buthionine sulfoximide (BSO) to inhibit glutathione synthesis.

**MAIN RESULTS AND THE ROLE OF CHANCE:** Pre-IVM with FSK + IBMX increased subsequent blastocyst formation rate and quality compared with standard IVM ( $P < 0.05$ ), regardless of pre-IVM duration. The final blastocyst yields (proportion of blastocysts/immature oocyte) were 26.3% for the control, compared with 39.2, 35.2 and 34.2%, for the 2, 4 and 6 h pre-IVM FSK + IBMX treatments, respectively. In contrast to standard IVM (control), pre-IVM with cAMP modulators maintained open gap junctions between cumulus cells and oocytes for the duration (6 h) of pre-IVM examined, and persisted for a further 8 h in the IVM phase. Cyclic AMP-modulated pre-IVM increased intra-oocyte GSH levels at the completion of both pre-IVM and IVM, in a pre-IVM duration-dependent manner ( $P < 0.05$ ), which was ablated when GJC was blocked using CBX ( $P < 0.05$ ). By 4 h of pre-IVM treatment with cAMP modulators, oocyte H<sub>2</sub>O<sub>2</sub> levels were reduced compared the control ( $P < 0.05$ ), although

this beneficial effect was lost when oocytes were co-treated with BSO. Inhibiting glutathione synthesis with BSO during pre-IVM ablated any positive benefits of cAMP-mediated pre-IVM on oocyte developmental competence ( $P < 0.01$ ).

**LIMITATIONS, REASONS FOR CAUTION:** It is unclear if the improvement in oocyte antioxidant defence and developmental competence reported here is due to direct transfer of total and/or reduced glutathione from cumulus cells to the oocyte via gap junctions, or whether a GSH synthesis signal and/or amino acid substrates are supplied to the oocyte via gap junctions. Embryo transfer experiments are required to determine if the cAMP-mediated improvement in blastocyst rates leads to improved live birth rates.

**WIDER IMPLICATIONS OF THE FINDINGS:** IVM offers significant benefits to infertile and cancer patients and has the potential to significantly alter ART practice, if IVM efficiency in embryo production could be improved closer to that of conventional IVF (using ovarian hyperstimulation). Pre-IVM with cAMP modulators is a simple and reliable means to improve IVM outcomes.

**STUDY FUNDING/COMPETING INTEREST(S):** This work was supported by grants and fellowships from the National Health and Medical Research Council of Australia (1007551, 627007, 1008137, 1023210) and by scholarships from the Chinese Scholarship Council (CSC) awarded to H.J.L. and the Japanese Society for the Promotion of Science Postdoctoral Fellowship for Research Abroad awarded to S.S. The Fluoview FV10i confocal microscope was purchased as part of the Sensing Technologies for Advanced Reproductive Research (STARR) facility, funded by the South Australian Premier's Science and Research Fund. We acknowledge partial support from the Australian Research Council Centre of Excellence for Nanoscale BioPhotonics (CE140100003). We declare that there is no conflict of interest that could be perceived as prejudicing the impartiality of the research reported.

**Key words:** oocyte *in vitro* maturation / cyclic AMP / gap-junctional communication / glutathione / oocyte quality

## Introduction

Conventional IVF, or the generation of embryos and pregnancies following ovarian hyperstimulation, has proved a great medical advance. Yet the technology remains inefficient, with only an 18% success rate (live birth/initiated IVF cycle; [Macaldowie et al., 2014](#)), it is expensive and ovarian hyperstimulation is not without significant health risks ([Market-Velker et al., 2010](#); [Seggers et al., 2014](#)). Oocyte *in vitro* maturation (IVM) is a related useful technique to generate mature oocytes and embryos for clinical infertility treatment but uses minimal or no ovarian hyperstimulation ([Edwards, 1965](#)). Clinical application of IVM has remained limited due to lower embryo yield and subsequent pregnancy rates compared with conventional IVF ([Nagai, 2001](#); [Gremeau et al., 2012](#)), although recent improvements in pregnancy rates are providing significant promise ([Ortega-Hrepich et al., 2013](#); [Walls et al., 2015](#)). IVM is particularly attractive to patients who suffer from polycystic ovary syndrome as these patients have a high antral follicle count and are at risk of developing ovarian hyperstimulation syndrome during conventional IVF. Furthermore, with ever increasing cancer survival rates, IVM has an important place in modern fertility preservation approaches, using oocytes collected either from *in vivo* or *ex vivo* ovaries ([Smitz et al., 2011](#)). In recent years, improvement has been made in the efficacy of IVM in animals and translating these advances to human IVM stands to bring significant benefits to healthcare providers and to patients ([Gilchrist et al., 2011](#)).

It is widely accepted that the low efficiencies of IVM are in part due to precocious oocyte meiotic resumption following artificial removal of cumulus-oocyte complexes (COCs) from antral follicles and subsequent culture ([Gilchrist and Thompson, 2007](#)). We and others have demonstrated that a temporary inhibition of spontaneous meiotic resumption, achieved by preventing a fall in intra-oocyte cyclic adenosine monophosphate (cAMP) level through the use of cAMP modulators prior to maturation (pre-IVM), better recapitulates some of the oocyte maturation processes that occur *in vivo*, leading to greater oocyte developmental competence ([Luciano et al., 1999](#); [Guixue et al., 2001](#); [Shu et al., 2008](#);

[Albuz et al., 2010](#); [Rose et al., 2013](#); [Zeng et al., 2013, 2014](#); [Franciosi et al., 2014](#); [Richani et al., 2014](#)). There are several options to prevent the reduction in cAMP during this pre-IVM period, including the use of specific and non-specific phosphodiesterase (PDE) inhibitors or dibutyl-cAMP ([Funahashi et al., 1997](#); [Gilchrist, 2011](#)). We have previously shown that using the non-specific PDE inhibitor, 3-isobutyl-1-methylxanthine (IBMX), in conjunction with increasing cAMP synthesis in COCs with the adenylate cyclase activator, FSK, significantly improves oocyte developmental competence as measured by blastocyst development rates and post-transfer foetal yield ([Albuz et al., 2010](#); [Zeng et al., 2013, 2014](#); [Richani et al., 2014](#)). The application of cAMP-modulated IVM is now at the pre-clinical stage in human assisted reproductive technology (ART) ([Spits et al., 2015](#)). Moreover, in the mouse, blastocyst yield and quality was greater when the pre-IVM period was lengthened beyond 1 h ([Richani et al., 2014](#)) and 20 h of dibutyl-cAMP treatment is routinely used in porcine IVM ([Funahashi et al., 1997](#)), suggesting that the duration of cAMP-modulated pre-IVM has important effects on oocyte developmental competence.

Treatment of COCs with cAMP modulators prolongs cumulus-oocyte gap-junctional communication (GJC) during IVM ([Thomas et al., 2004a,b](#); [Shu et al., 2008](#); [Luciano et al., 2011](#); [Franciosi et al., 2014](#)). Bidirectional crosstalk between the oocyte and cumulus cells (CCs) are essential for oocyte growth, for enabling nutrients and other small molecules to transfer between them, together ensuring that the oocyte acquires the molecular machinery required to support early embryo development ([Zuccotti et al., 1998](#); [Albertini et al., 2001](#); [Gilchrist et al., 2004](#)). One such factor exchanged between CCs and the oocyte is reduced glutathione (GSH). CC-oocyte GJC has been reported to regulate intra-oocyte GSH synthesis and accumulation ([de Matos et al., 1997, 2002](#); [Nagai, 2001](#)). GSH plays important roles as a reducing agent (and therefore an antioxidant) in oocyte maturation, fertilization and embryonic development ([Curnow et al., 2008](#); [Takeo et al., 2015](#)). We hypothesize that one mechanism by which pre-IVM with cAMP modulators improves oocyte competence is to facilitate CC transfer and accumulation of GSH within the oocyte during the pre-IVM

period. Furthermore, we assessed if intra-oocyte GSH levels are increased by extending the duration of cAMP-mediated pre-IVM (2, 4, 6 h). We undertook these experiments using bovine oocytes as it has proven a valuable experimental model to understand the complexities of human oocyte developmental competence and the technological approaches needed to improve human IVM.

## Materials and Methods

### COC collection

Bovine COCs were obtained from abattoir-derived ovaries of primarily cycling animals (but of different breeds and fecundity) and transported to the laboratory at 35–37°C within 5 h of collection. COCs were aspirated using an 18-gauge needle and a 10-ml syringe from 3 to 8 mm diameter follicles of mixed growth and atresia status (Sirois and Fortune, 1988), and retained in follicular fluid until transferred into pre-IVM medium (Albuz et al., 2010).

### COC IVM

Oocytes were matured *in vitro* using the simulated physiological oocyte maturation (SPOM) version 2 system (Zeng et al., 2014; Gilchrist et al., 2015). Differing duration of pre-IVM (0, 2, 4, 6 h) was a central variable examined in most experiments. Accordingly, the ensuing IVM interval was either, (i) varied in some experiments to give a constant total time *in vitro* or (ii) kept constant such that total time *in vitro* was extended.

#### pre-IVM

Depending on the experimental design, immature COCs were removed from aspirated follicular fluid, washed three times and cultured in Vitromat (IVF Vet Solutions, Adelaide, Australia) containing 4 mg/ml fatty acid-free bovine serum albumin (BSA; ICPbio Ltd, Auckland, NZ), with or without 100 µM FSK (Sigma) and 500 µM IBMX (Sigma), during pre-IVM periods (0, 2, 4 or 6 h). Millimolar stock concentrations of the cAMP modulators were stored at –20°C dissolved in anhydrous dimethylsulphoxide (Sigma) solutions and were diluted fresh for each experiment.

#### IVM

Following the pre-IVM treatments, bovine COCs were washed three times before maturation in Vitromat + 4 mg/ml BSA + 50 µg/ml gentamycin (Sigma) + 100 mIU/ml recombinant human FSH (Puregon, Organon) for 14–24 h, depending on experimental design. Each replicate included thirty to forty COCs per treatment and were cultured in pre-equilibrated 500 µl drops overlaid with paraffin oil (Sigma) and incubated at 38.5°C with 6% CO<sub>2</sub> in humidified air for the time intervals indicated.

### Assessment of oocytes

Oocytes were stained using the orcein staining methods, as described and validated previously (Prentice-Biensch et al., 2012), for the assessment of oocyte nuclear maturation. Briefly, oocytes were stripped of CCs, mounted onto a glass slide and overlaid with a wax supported coverslip. Denuded oocytes were fixed in ethanol:acetic acid (3:1, v/v) by using capillary action to run the solution between the slide and coverslip, then stored at 4°C for 24 h. Oocytes were stained with 1% orcein (w/v) in 45% acetic acid (v/v) for 20 min by the same process and then cleared with a mix of 20% glycerol and 20% acetic acid in water. Chromosomal configurations were evaluated using phase-contrast microscopy (Olympus, Tokyo, Japan) and the stages of meiosis recorded.

Intra-oocyte GSH content was measured as described previously (Keelan et al., 2001) using monochlorobimane (MCB, Sigma), a probe which reacts

with reduced thiol groups (-SH) to form fluorescence adducts. As MCB has the highest affinity for GSH, 99% of positive fluorescence is attributed to binding with GSH (Keelan et al., 2001). COCs were cultured intact for variable intervals depending on the treatment, oocytes were denuded of CCs and then incubated in wash medium (Vitrowash, IVF Vet Solutions) containing 12.5 µM MCB at 39°C in darkness for 30 min. Oocytes were washed twice in wash medium and transferred to 5 µl of wash medium overlaid with paraffin oil in a glass bottom confocal dish (Cell E&G, Houston, TX, USA). Oocytes were examined by using an Olympus Fluoview FV10i confocal microscope (Olympus) with an excitation wavelength of 358 nm and emission 461 nm. Relative differences in GSH content, represented by the MCB–GSH fluorescence, were determined using ImageJ software 1.33u (National Institutes of Health, Bethesda, MD, USA) and normalized to the mean value of the background (excluding oocytes) in each image. Microscope laser settings were standardized using Inspeck green fluorescence beads (Molecular Probes, Eugene, OR, USA).

Intra-oocyte H<sub>2</sub>O<sub>2</sub> levels were measured by peroxyfluor-1 (PF-1), a specific fluorophore for H<sub>2</sub>O<sub>2</sub> (with some cross-reactivity with ONOO<sup>–</sup>, as previously described (Purdey et al., 2015)). In brief, following denuding, oocytes were transferred to wash medium containing 100 µM PF-1 at 39°C in darkness. After 30 min incubation, oocytes were washed once in VitroWash, and oocytes transferred into 5 µl of wash medium overlaid with paraffin oil in a glass bottom confocal dish. Fluorescence intensity was determined by confocal microscopy (excitation: 488 nm; emission: 520 nm) using the same procedure as described above.

### Assessment of CC-oocyte GJC

Assessment of GJC between CCs and the oocyte during pre-IVM or IVM was determined by Lucifer yellow (LY; Sigma) dye transfer following microinjection of dye into the ooplasm of intact COCs, as previously described (Luciano et al., 2004). Briefly, a 3% (w/v) LY solution in 5 mM lithium chloride was injected into the oocyte. If CC–oocyte gap junctions are open then the dye is free to diffuse into the CCs which can be observed and scored, whereas no dye transfer occurs if GJC has ceased. The transfer of dye to surrounding CCs was assessed by confocal microscope within 15 min of injection. Using a qualitative scoring system a semi-quantitative GJC index can be calculated (Sugimura et al., 2014). In brief, CC LY levels were scored as +2 when the dye was transferred to the entire cumulus layer; +1 when the dye was transferred to limited number of CC layers (primarily the corona radiate); and 0 when there was minimal to no dye transfer into any CCs.

### *In vitro* embryo production and differential staining

*In vitro* embryo production followed methods previously described (Hussein et al., 2006). In brief, following IVM, COCs were washed twice in wash medium and co-cultured with motile sperm from a single bull of proven fertility (prepared using a discontinuous Percoll gradient, GE Healthcare) in 500 µl of pre-equilibrated IVF medium (VitroFert, IVF Vet Solutions, +4 mg/ml BSA + 10 IU/ml heparin), at a final concentration of 1 × 10<sup>6</sup>/ml frozen–thawed sperm and cultured at 38.5°C in 6% CO<sub>2</sub> in humidified air. After 22 h from the addition of sperm (Day 1), presumptive zygotes were denuded of CCs by gentle pipetting and cultured in groups of 5–10 in 20 µl drops of VitroCleave (IVF Vet Solutions) + 4 mg/ml BSA, overlaid with paraffin oil at 38.5°C in 7% O<sub>2</sub>, 6% CO<sub>2</sub>, N<sub>2</sub> balance. On Day 5, 5–10 embryos were transferred into 20 µl of VitroBlast (IVF Vet Solutions) + 4 mg/ml BSA, overlaid with paraffin and cultured at 38.5°C in 7% O<sub>2</sub>, 6% CO<sub>2</sub>, N<sub>2</sub> balance. The rates of early and final cleavage embryo development were assessed at 22 h on Days 1 and 5, respectively. Blinded embryo assessments, including yield of blastocysts and hatched blastocysts, were performed on Day 8. On Day 8 post-IVF, blastocysts in each group were processed using a differential staining protocol to determine inner

cell mass (ICM) and trophectoderm (TE) cell numbers, as previously described (Hussein *et al.*, 2006). Differential staining was performed as ICM cell numbers provide a robust measure of blastocyst quality, implantation and foetal developmental potential (Lane and Gardner, 1997; Sudiman *et al.*, 2014). The zona pellucida was removed by incubation in 0.5% pronase in Dulbecco's phosphate-buffered saline (PBS) at 39°C. Embryos were washed in protein-free PBS and incubated in 10% 2,4,6-trinitrobenzene sulfonic acid in PBS for 10 min at 4°C in the dark; 10 min in anti-2,4-dinitrophenol (1:10, w/v) at 39°C, followed by 10 min in complement (2 µg/ml solution of propidium iodide: guinea pig serum, 1:1). Embryos were transferred to (97%) ethanol containing 25 µg/ml of Hoechst 33342 (bisbenzimidazole) at 4°C for overnight staining. Embryos were mounted on microscope slides in 100% glycerol and the number of ICM and TE cells was determined using an epifluorescence microscope (excitation = 340–380 nm; emission = 440–480 nm), whereby nuclei appeared blue and pink, respectively.

## Statistical analysis

Number of COCs per treatment and data set replicate numbers are provided in the figure legends for each experiment. Proportional data for embryo development were arcsine transformed before statistical analyses. Treatment effects were assessed by one-way or two-way ANOVA followed by Turkey's multiple-comparison post hoc test to identify individual differences between means, using Prism 5.00 GraphPad for Windows (GraphPad Software, San Diego, CA, USA). Two sample *t*-tests were used where only two sample means were compared. Statistical significance was taken as  $P < 0.05$ .

## Results

### Effect of pre-IVM duration on bovine oocyte meiotic and developmental competence

The relationship between the duration of cAMP-modulated pre-IVM and the subsequent temporal kinetics of bovine oocyte meiotic maturation remains unclear. Here we examined the effect of 0, 2, 4 and 6 h pre-IVM treatment with forskolin and IBMX, followed by FSH-stimulated IVM, on oocyte meiotic maturation (Fig. 1). Decreased pre-IVM duration, with a combined total 20 h of culture (pre-IVM + IVM), led to an incremental increase in Metaphase II (MII) rates (Fig. 1). However, only the 6 h pre-IVM treatment (6 h pre-IVM + 14 h IVM) yielded significantly fewer MII oocytes compared with no pre-IVM (0 h pre-IVM + 20 h IVM;  $P < 0.05$ ). In contrast, when the pre-IVM time varied (0, 2, 4 and 6 h) followed by 20 h IVM, there was no difference in the yield of MII oocytes. These data demonstrate that extended pre-IVM (e.g. 6 h) delays total time to MII and hence a total (pre-IVM + IVM) culture period of 26 h was chosen for oocyte developmental competence experiments.

This led us to examine subsequent embryo development following pre-IVM periods of 0, 2, 4 and 6 h, combined with IVM for 24, 24, 22 and 20 h, respectively (Fig. 2A). An increase in the yield of early cleaved embryos at 22 h post-IVF was observed with 4 and 6 h pre-IVM periods compared with no pre-IVM ( $P < 0.05$ ; Fig. 2B), demonstrating that prolonging pre-IVM duration accelerates 2-cell embryo development, which is a strong predictor of pregnancy success (Sugimura *et al.*, 2012). Although final cleavage rates (as assessed on Day 5) were not significantly different between groups (Fig. 2C), all pre-IVM treatments increased the proportion of Day 8 blastocysts/total embryos cleaved compared with no pre-IVM ( $P < 0.05$ ; Fig. 2D). Hence, the

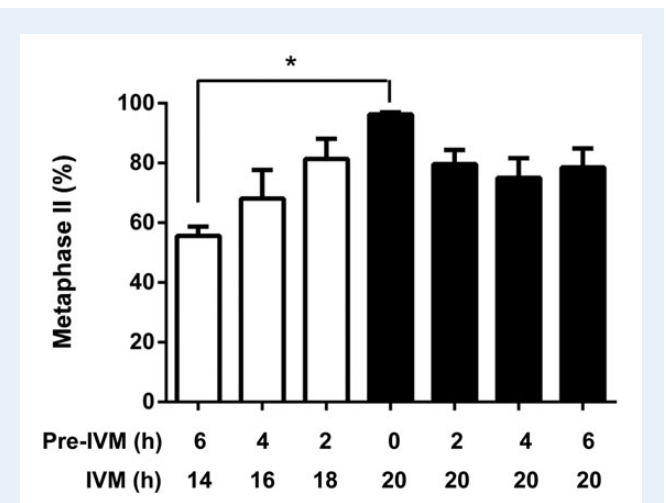

**Figure 1** Effect of pre-*in vitro* maturation (IVM) duration on bovine oocyte meiotic maturation. Immature cumulus-oocyte complexes (COCs) were cultured in standard IVM with FSH (no pre-IVM + 20 h IVM) or pre-IVM medium containing forskolin (FSK) and 3-isobutyl-1-methylxanthine (IBMX) for 2, 4 or 6 h, then either 18, 16 or 14 h, respectively, of standard IVM, or 20 h of IVM for each pre-IVM treatment. Metaphase II rates were assessed ( $n \geq 89$  COCs per group over four replicate experiments). Data are mean  $\pm$  SEM. Asterisk indicates bars are significantly different ( $P < 0.05$ ; one-way analysis of variance (ANOVA)).

final blastocyst yields (proportion of blastocysts/immature oocyte) were 26.3% for the control, compared with 39.2, 35.2 and 34.2%, for the 2, 4 and 6 h pre-IVM treatments, respectively. Only the 6 h pre-IVM period treatment yielded significantly more hatched blastocysts than no pre-IVM treatment ( $P < 0.05$ ; Fig. 2E). Importantly, all the pre-IVM treatments improved blastocyst quality, reflected by an increase in total number of cells compared with no pre-IVM, made up largely by an increased ICM cell number (Fig. 2F;  $P < 0.05$ ), and notably, the 6 h pre-IVM treatment yielded the highest ratio of ICM to total cells among all treatments, and was significantly different to that of no pre-IVM ( $P < 0.05$ ; Fig. 2F inset).

### Effect of pre-IVM duration on bovine CC-oocyte GJC during pre-IVM and IVM stages

GJC integrity was measured by assessing LY dye transfer from the oocyte to the surrounding cumulus vestment (Fig. 3A) following 0, 2, 4 and 6 h of pre-IVM with or without forskolin and IBMX (Fig. 3B), or after 0, 4, 8 and 12 h of IVM in the presence of FSH (Fig. 3C). As shown in Fig. 3B, during pre-IVM, GJC in the control group (no cAMP modulators) fell sharply and progressively until 6 h of culture. On the contrary, the GJC remained high for up to 6 h of culture in all pre-IVM groups in the presence of FSK and IBMX. With regard to the combination of pre-IVM and IVM, during the first 8 h of the IVM phase, GJC remained significantly ( $P < 0.05$ ) higher than control (no pre-IVM) when COCs had been previously exposed to a cAMP-mediated pre-IVM treatment of at least 2 h (Fig. 3C). By 12 h of culture no differences were observed among any groups, indicating that under these conditions, the limit to CC-oocyte GJC is 12 h of IVM.



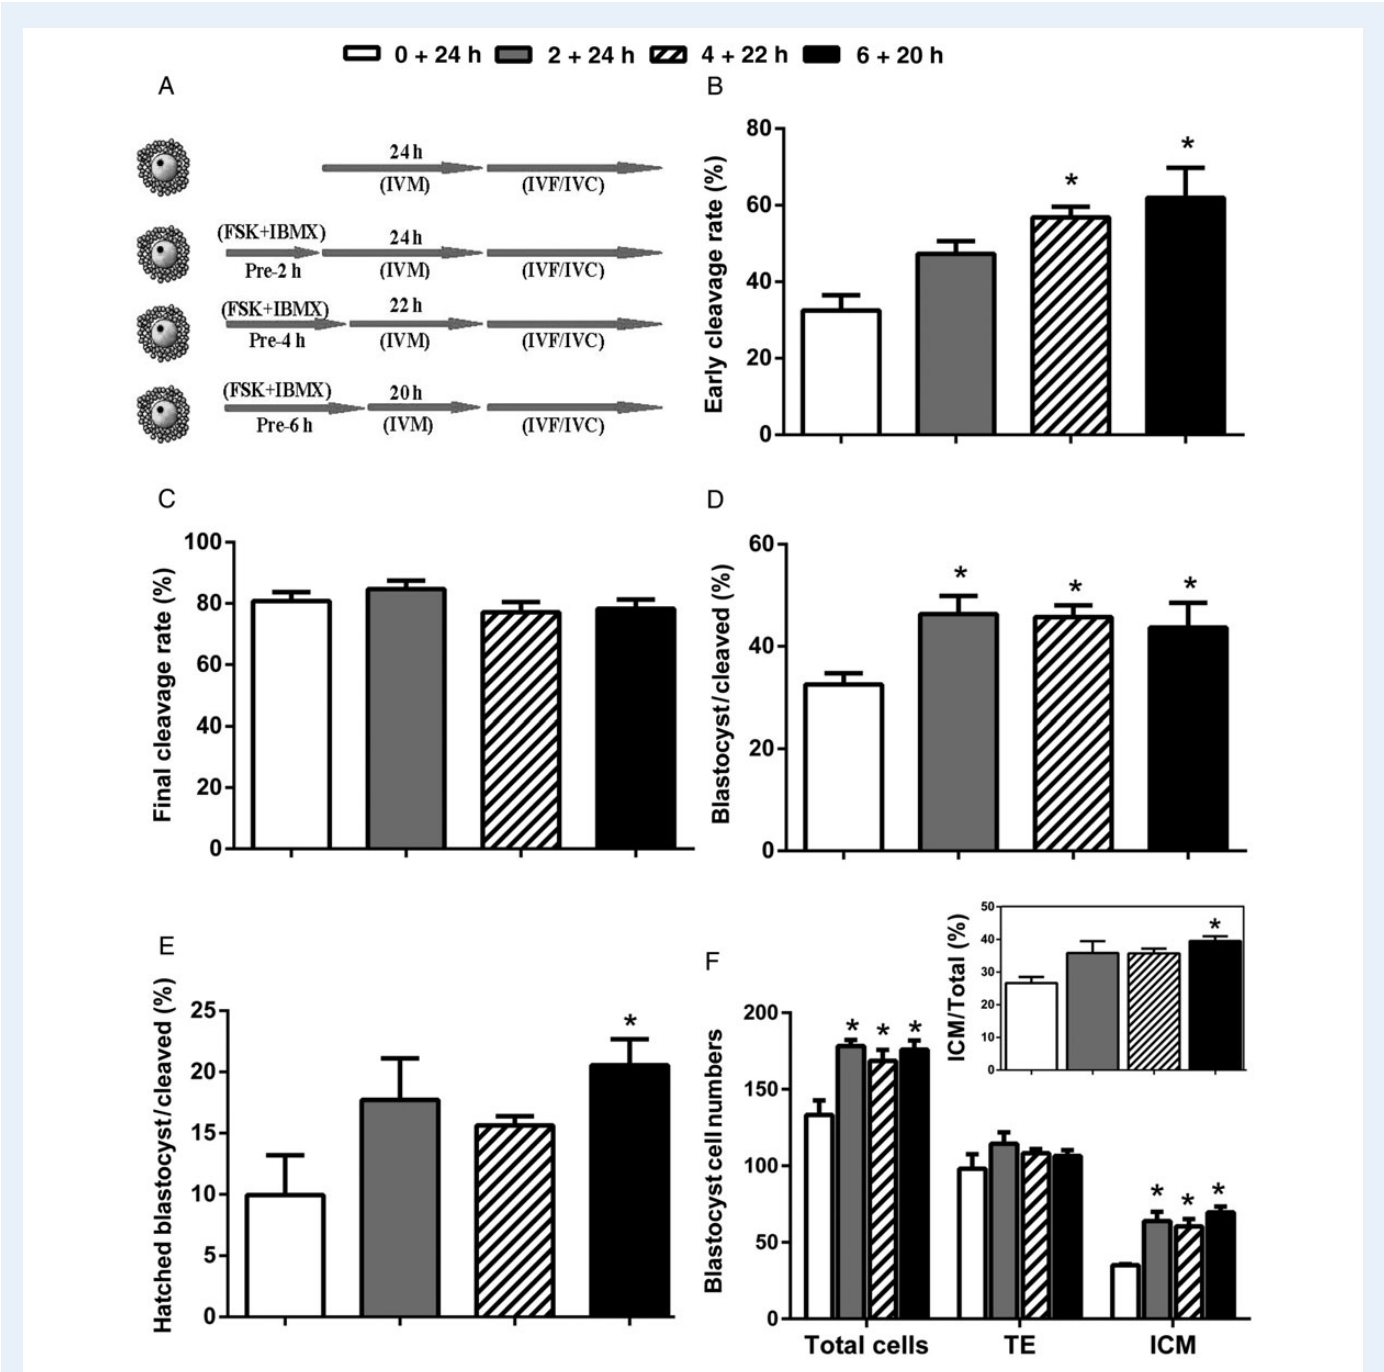

Effect of pre-IVM on the level of bovine intra-oocyte GSH content during IVM

The representative images of intra-oocyte MCB fluorescence at 0 and 24 h of IVM, indicative of GSH levels, are presented in Fig. 4A. The

duration of pre-IVM exposure to FSK + IBMX significantly affected intra-oocyte GSH content, with levels at the end of pre-IVM (0 h IVM) significantly higher after 4 or 6 h of pre-IVM, in comparison with 2 h and the control (no pre-IVM) group (Fig. 4B;  $P < 0.05$ ). This pattern persisted after 24 h of IVM, where intra-oocyte GSH was higher with

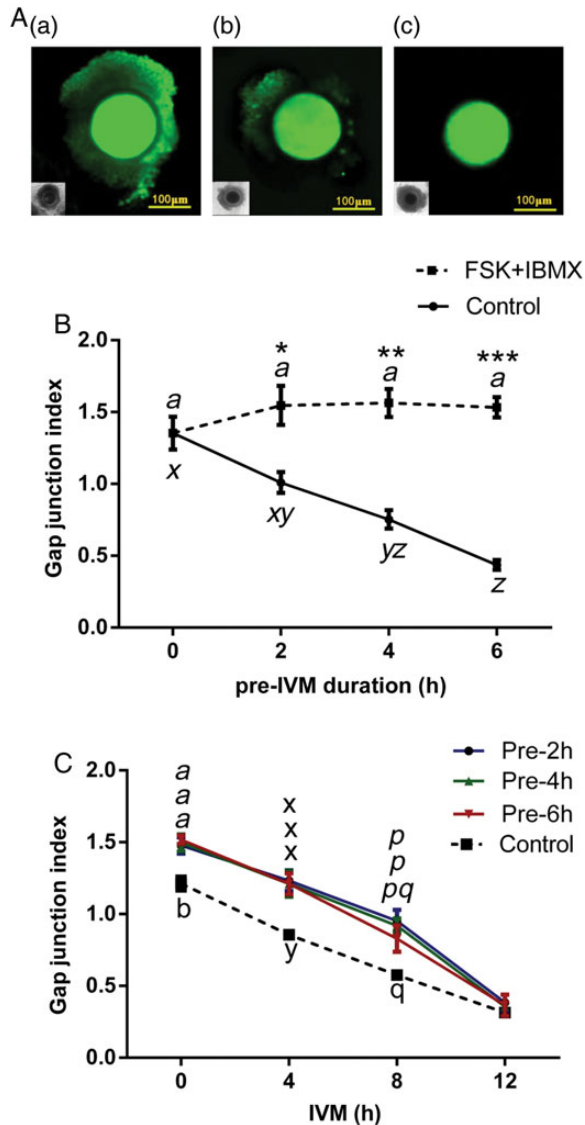

**Figure 3** Effect of pre-IVM duration on bovine cumulus-oocyte gap-junctional communication (GJC) during pre-IVM and IVM stages. The functional coupling between oocyte and cumulus cells was assessed after lucifer yellow dye injection. As shown in the representative images (A), gap junctions were classified as open (a), partial (b) or closed (c), and scored as 2, 1, 0, respectively, and the gap junction index calculated. A total of 690 oocytes were used in these experiments (3 replicates per group). (B) COCs were treated with or without FSK + IBMX in pre-IVM and GJC was assessed at 0, 2, 4 or 6 h. 'a' represents the lack of difference between time points within the FSK + IBMX treatment. Means with non-common letters (x, y, z) are significantly different ( $P < 0.05$ ; one-way ANOVA) between time points within the control treatment. Asterisks indicate means that are significantly different ( $P < 0.05$ ; t-test) between pre-IVM treatments at that time point. (C) COCs were treated with or without FSK + IBMX in pre-IVM for 2, 4 or 6 h, and then cultured in IVM with FSH and then GJC was assessed at 0, 4, 8 or 12 h of IVM. Means with no common superscript letters 'a–b, x–y, p–q' within a time point are significantly different ( $P < 0.05$ ; two-way ANOVA).

increasing length of the pre-IVM period, with a significantly ( $P < 0.05$ ) higher content observed in the 6 h pre-IVM group compared with the control. This indicates that longer pre-IVM periods influence intra-oocyte GSH accumulation, not only during the pre-IVM stages but also possibly throughout IVM. Based on this, we hypothesized that GSH accumulation in the oocyte from pre-IVM treatment was due to the enhanced GJC.

### Effect of inhibiting GJC on GSH accumulation

To assess the contribution of CC-oocyte GJC to intra-oocyte GSH levels following pre-IVM treatment with FSK and IBMX, we treated COCs during pre-IVM with carbenoxolone (CBX), a known gap junction inhibitor which we previously validated in bovine COCs (Thomas *et al.*, 2004a,b), and assessed LY dye transfer from the oocyte to the cumulus vestment and intra-oocyte MCB fluorescence. CBX was effective at blocking CC-oocyte GJC (Fig. 5A;  $P < 0.01$ ) at 4 h of culture in the presence of FSK and IBMX. The intra-oocyte GSH content was significantly decreased (Fig. 5B;  $P < 0.05$ ) by CBX in both control and FSK + IBMX treated COCs. These results provide further evidence that CCs contribute to the accumulation of GSH in the oocyte via a GJC-mediated mechanism and that intra-oocyte GSH levels are enhanced by FSK and IBMX during the pre-IVM period.

### Effect of inhibition of GSH synthesis on $H_2O_2$ production and embryonic development

As intra-oocyte GSH levels are regarded as important in managing reducing reactive oxygen species (ROS) in the oocyte (Guerin *et al.*, 2001), we assessed the effect of depleted oocyte GSH levels on  $H_2O_2$  content of oocytes and their subsequent developmental capacity. We depleted oocyte GSH levels by treating COCs with 10 mM buthionine sulfoximide (BSO) a validated inhibitor of glutathione synthase (Sutovsky and Schatzen, 1997). BSO treatment ablated the pre-IVM (FSK + IBMX)-induced increase in intra-oocyte GSH (Fig. 6C;  $P < 0.05$ ).  $H_2O_2$  production in the oocyte was evaluated with PF-I staining (Fig. 6A; Purdey *et al.*, 2015). Pre-IVM with FSK + IBMX significantly decreased intra-oocyte  $H_2O_2$  levels (Fig. 6A(b) and B), but this response was eliminated with BSO treatment, suggesting that reduction of GSH levels coincides with an increase in  $H_2O_2$  production in oocytes.

The effect of inhibiting GSH synthesis during the 4 h of pre-IVM on subsequent embryonic development was examined after IVF and embryo culture (Fig. 6D). Although no significant difference in cleavage rates was observed, 4 h of BSO treatment of oocytes significantly ( $P < 0.01$ ) reduced Day 8 blastocyst and hatched blastocyst yields, indicating that the synthesis of GSH in the pre-IVM period has a marked effect on subsequent embryo developmental potential.

## Discussion

Here we report that increasing the length of pre-IVM treatment with FSK and IBMX positively impacts GJC in bovine COCs, which in turn increases intra-oocyte GSH and lowers intra-oocyte  $H_2O_2$ , establishing a mechanism contributing to the improved oocyte developmental competence observed following pre-IVM in the presence of cAMP modulators. The use of cAMP modulators during pre-IVM and/or IVM, to provide a high intracellular cAMP levels within CCs and the oocyte, is

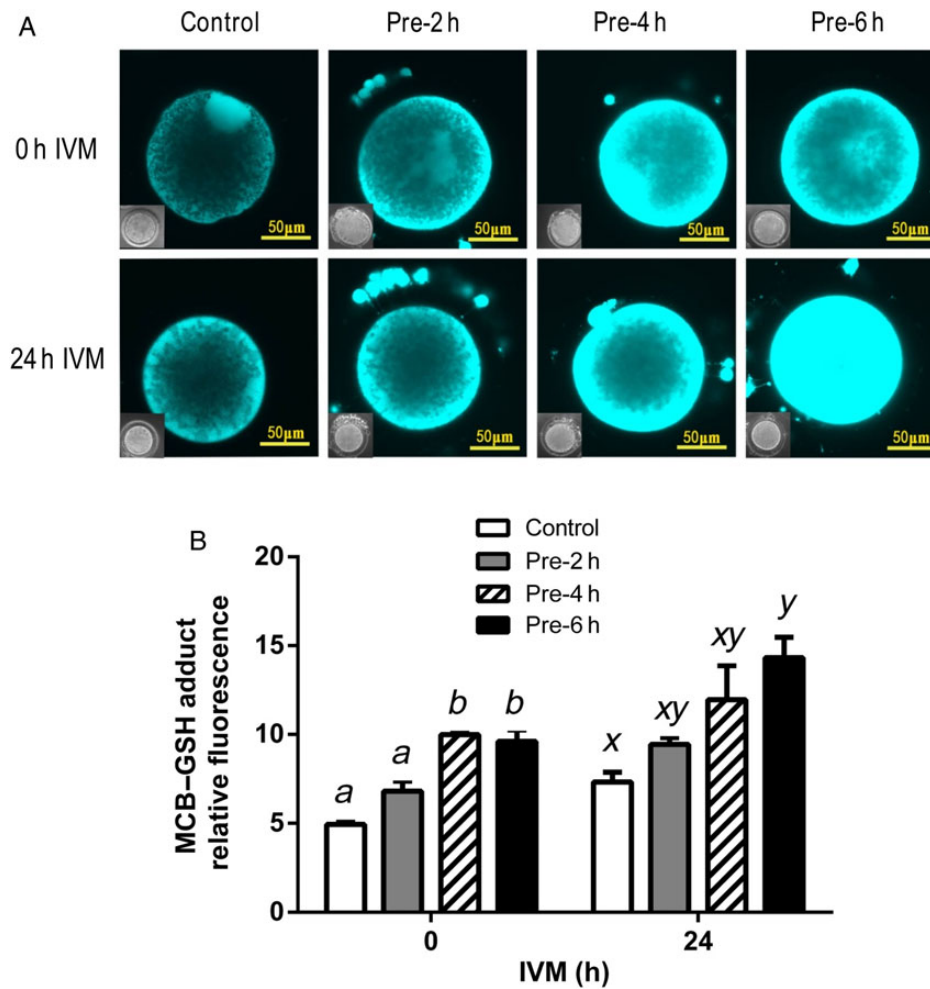

**Figure 4** Effect of pre-IVM duration on bovine intra-oocyte reduced glutathione (GSH) levels during IVM. Intact immature COCs were subjected to 0, 2, 4 or 6 h pre-IVM culture with FSK and IBMX, followed by standard IVM for 0 h (end of pre-IVM treatment) or 24 h. After that, COCs were denuded of cumulus cells and the naked oocytes were incubated with monochlorobimane (MCB) to form MCB–GSH adducts, and observed under a laser scanning confocal microscope. **(A)** Images of oocytes from the four pre-IVM treatments at the end of pre-IVM (0 h IVM; upper panel) and at 24 h of IVM (lower panel). **(B)** MCB–GSH relative fluorescent values from each pre-IVM group ( $n = 10$  COCs per group over 3 replicate experiments) at 0 or 24 h of IVM. Means within a time point with no common superscripts 'a–b, x–y' are significantly different ( $P < 0.05$ ; one-way ANOVA).

associated with prolonged CC-oocyte GJC (Luciano et al., 2004; Thomas et al., 2004a,b; Shu et al., 2008; Albuz et al., 2010; Franciosi et al., 2014), in addition to the inhibition, or at least a delay, in the timing of germinal vesicle breakdown (GVBD). The resumption and completion of meiosis is particularly delayed when cAMP modulating agents (FSK + IBMX) are present during pre-IVM stage and combined with cilostamide, a PDE3 inhibitor, during the IVM phase, as per the 'SPOM' version 1 system (Albuz et al., 2010). Further work showed that the beneficial impact of the SPOM system may lie specifically in the pre-IVM period (Zeng et al., 2013, 2014; Richani et al., 2014), which led to the concept of SPOM version 2 (SPOMv2), wherein there is an absence of cAMP modulators during IVM (Gilchrist et al., 2015), and is the system used in the current study. Numerous mechanisms have been identified as contributing to enhanced developmental competence following SPOMv2, such as enhanced COC oxygen consumption and oocyte oxidative metabolism (Zeng et al., 2013, 2014; Richani et al.,

2014) and accentuating epidermal growth factor signaling in CCs (Zeng et al., 2013, 2014; Richani et al., 2014). Here we add to these concepts by revealing that extending the pre-IVM period for up to 6 h further enhances oocyte developmental competence, most likely by increasing the oocyte's antioxidant defence and decreasing ROS levels.

The pre-ovulatory gonadotrophin surge leads to a transient increase of cAMP in the somatic compartment of the follicle, including in CCs (Tsafiri et al., 1972; Yoshimura et al., 1992; Mattioli et al., 1994; Albuz et al., 2010), but a simultaneous fall in intra-oocyte cGMP and cAMP (Norris et al., 2009). This cAMP surge in the COC is typically impaired or absent using standard clinical IVM protocols, with likely deleterious consequences for oocyte developmental competence, which is the impetus for developing cAMP-modulated IVM systems (Gilchrist, 2011). Such IVM systems typically use a pre-IVM phase containing cAMP elevating agents; COCs are commonly exposed to cAMP modulators for 0.25–2 h prior to IVM (Luciano et al., 1999; Guixue et al.,

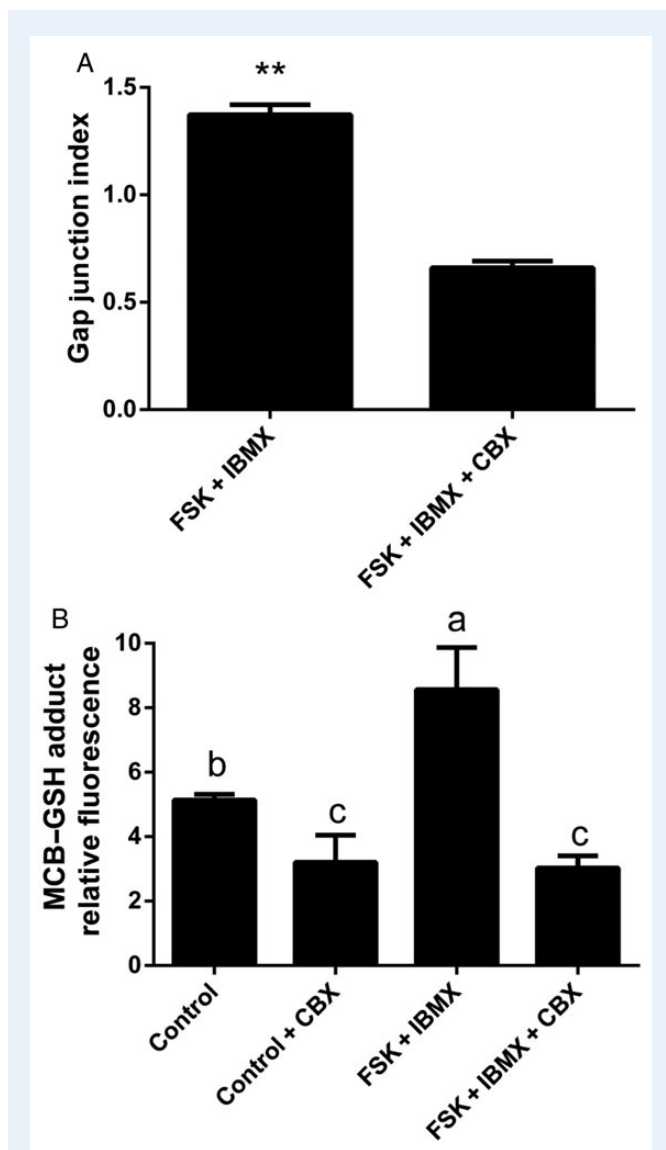

**Figure 5** Effect of the blocked GJC on bovine intra-oocyte GSH. Immature COCs were incubated for 4 h with or without FSK + IBMX and with or without carbenoxolone (CBX), a known blocker of gap junctions. **(A)** The blocking action of CBX was validated on FSK + IBMX treated COCs ( $n = 10$  per group over three replicate experiments) by assessment of the gap-junctional index after 4 h of CBX treatment (\*\*;  $P < 0.01$ ;  $t$ -test). **(B)** Intra-oocyte GSH content, represented by MCB-GSH adduct relative fluorescence value, was assessed after 4 h of culture ( $n = 10$  oocytes per group over three replicate experiments). Means with no common superscripts (a–c) are significantly different ( $P < 0.05$ ; one-way ANOVA). Data are mean  $\pm$  SEM.

2001; Albuz *et al.*, 2010), but this can be up to 20 h, for example using porcine oocytes (Funahashi *et al.*, 1997) coinciding with GVBD in that species.

While the beneficial effects of cAMP-modulated pre-IVM on oocyte competence are well accepted, the optimal duration of pre-IVM is largely unknown. A recent study shows extending pre-IVM exposure to cAMP modulators beyond 1–2 h appears beneficial to mouse oocyte quality (Richani *et al.*, 2014). In this study we investigated the

effect of 0, 2, 4 and 6 h of pre-IVM with FSK + IBMX followed by standard IVM on subsequent embryo development. Consistent with previous studies using a 2 h pre-IVM system, all pre-IVM durations examined here led to notable improvements in subsequent embryo development and quality, compared with standard IVM. The 6 h pre-IVM treatment had an optimal effect on oocyte development competence, as reflected in the fastest rate of 2-cell embryo formation, the highest yield of hatched blastocysts and notably the highest ratio of ICM to total cells among all treatments. It has previously been shown that rapid cleave of bovine embryos is a strong predictor of embryo quality and pregnancy success, as assessed by embryo karyotyping, expression of interferon tau and pregnancy rates (Sugimura *et al.*, 2012). In addition, in an IVM context, it is common to see the effects of treatments that improve oocyte quality having little or no effect on MII and total cleavage rates, but manifesting in increased blastocyst rates and ICM cell numbers, both of which are associated with improved implantation and foetal survival rates (Albuz *et al.*, 2010; Sudiman *et al.*, 2014).

One complication of using a cAMP-modulated IVM system and altering the pre-IVM interval is the effect on oocyte meiotic kinetics (Gilchrist *et al.*, 2015), which is compounded by the fact that FSK acts initially as an inhibitor and then an inducer of meiosis (Dekel *et al.*, 1988; Yoshimura *et al.*, 1992). Hence, we examined the time required to reach MII using the different pre-IVM durations with the consequence that, with a 6 h pre-IVM interval, the IVM phase was shortened to 20 h (total of 26 h).

In the current study, pre-IVM with FSK + IBMX fully sustained GJC functionality in COCs throughout the 6 h examined, in notable contrast to the loss of GJC that occurred in untreated COCs. Furthermore, the effect of pre-IVM on GJC persisted a further 8 h into the IVM phase. Hence, in the pre-IVM 6 h group, GJC was higher than in control COCs for a total of 14 h. Stimulation of CC cAMP synthesis by FSK or gonadotrophins enhances Cx43 (connexin 43) expression and stimulates phosphorylation of Cx43 at specific residues, possibly via a protein kinase A-dependent mechanism, collectively sustaining GJC functionality (Granot and Dekel, 1994; Thomas *et al.*, 2004a,b; Yogo *et al.*, 2006; Sasseville *et al.*, 2009). The use of FSH in conjunction with PDE inhibitors or natriuretic peptide precursor, which leads to oocyte PDE inhibition, also sustains CC-oocyte GJC (Thomas *et al.*, 2004a,b; Franciosi *et al.*, 2014). In the current study, the sustained somatic cell support to the oocyte through at least half of oocyte maturation is likely to be a key factor in the enhanced quality of subsequent oocytes (Gilchrist and Richani, 2013). One proposed benefit of CC support is the ordered cessation of oocyte transcription and appropriate remodeling of chromatin in preparation for meiosis (Luciano *et al.*, 2011; Franciosi *et al.*, 2014). Another benefit of extended CC-oocyte GJC is increased accumulation of beneficial CC nutrients and metabolites in the oocyte, such as glutathione (Gilchrist and Thompson, 2007).

Glutathione is the most abundant non-protein thiol in mammalian cells and the reduced form (GSH) plays a key role in cellular defence against oxidative injury as an important substrate for antioxidant enzymatic reactions that neutralize  $H_2O_2$  and potentially toxic electrophiles (Franco and Cidlowski, 2009). It is particularly important in mammalian oocytes where multiple actions have been described, including in oxidative stress defence (Guerin *et al.*, 2001), sperm decondensation and male pronuclear formation (Sutovsky and Schatten, 1997) as well as oocyte developmental competence (de Matos *et al.*, 1995, 1996; Cumow *et al.*, 2010). The central role of glutathione in oocyte developmental competence is now so widely accepted that glutathione precursors,



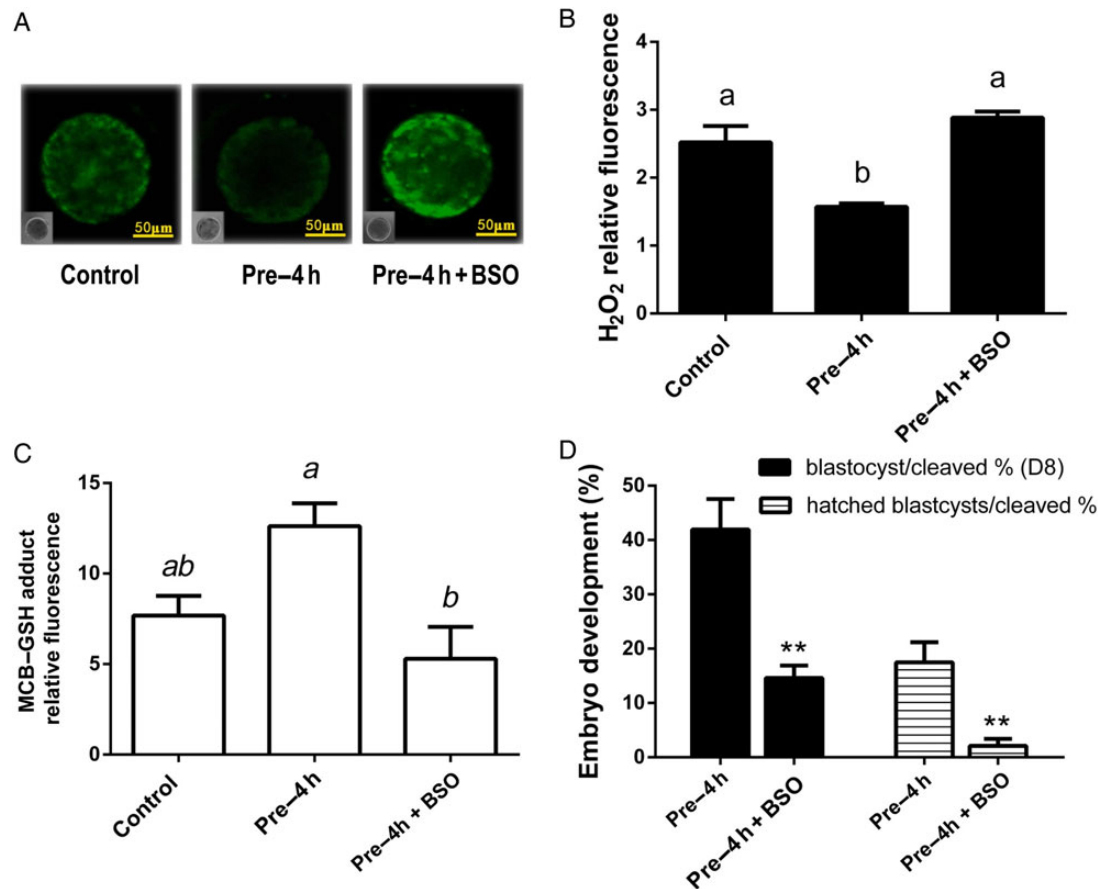

**Figure 6** Effect of inhibition of GSH synthesis on bovine oocyte hydrogen peroxide ( $\text{H}_2\text{O}_2$ ) production and embryonic development. Immature COCs were not cultured (control) or cultured with FSK + IBMX for 4 h, either in the absence (pre-4 h) or the presence of buthionine sulfoximide (BSO; pre-4 h + BSO). COCs were then denuded and intra-oocyte  $\text{H}_2\text{O}_2$  production was detected using peroxyfluor-I (PF-I) staining. Representative images (**A**) and quantitative levels (**B**) of  $\text{H}_2\text{O}_2$  relative fluorescence in oocytes from the control, pre-4 h and pre-4 h + BSO groups. (**C**) The effect of inhibition of GSH synthesis by BSO was validated by measuring intra-oocyte MCB-GSH staining. Each data observation was made on 10 oocytes and the experiments were replicated three times. Columns (mean  $\pm$  SEM) within a graph with no common superscript letters (*a–b*) are significantly different ( $P < 0.05$ ; 1-way ANOVA). (**D**) Oocyte developmental capacity was assessed on COCs subjected to 4 h pre-IVM (FSK + IBMX) either with or without BSO, followed by standard IVM in the presence of FSH for 24 h. After IVF, blastocyst and hatched blastocyst rates were assessed on Day 8. Data are mean  $\pm$  SEM;  $n = 315$  total COCs from four replicate experiments. Asterisk (\*\*) within each group indicates significantly different ( $P < 0.01$ ; *t*-test) to the pre-4 h group.

e.g. cysteamine and cysteine, are common additives in oocyte IVM media (Thompson et al., 2007). Early cleavage stage embryos have a poor capacity to synthesize glutathione (Gardiner and Reed, 1995), hence accumulation in oocytes during maturation is important for fertilization and subsequent developmental competence (de Matos and Furnus, 2000).

The current study demonstrates that pre-IVM with cAMP modulators increases intra-oocyte GSH, consistent with a recent study (Zeng et al., 2014). Moreover, the current results show that extending pre-IVM beyond 2 h leads to increased GSH accumulation in the oocyte in the pre-IVM phase, with these higher levels of GSH then persisting throughout the IVM phase. Blocking functional CC-oocyte coupling using CBX greatly decreased intra-oocyte GSH content during pre-IVM, suggesting that CCs supply the additional GSH to the oocyte via gap junctions, as previously reported (Mori et al., 2000; Ozawa et al., 2010). This is consistent with the observation that GSH levels are lower in oocytes denuded of CCs and that CCs can increase intra-oocyte GSH levels, but only when they are physically coupled to oocytes (de Matos et al., 1997; Curnow et al.,

2010). It is noteworthy that glutathione is predominantly synthesized in the COC in the GV to GVBD period. Up-regulation of glutathione synthesis occurs rapidly in response to the pre-ovulatory gonadotrophin surge and an increase in intra-oocyte glutathione, from basal levels in GV oocytes to maximal levels in MII oocytes, is needed in preparation for fertilization and sperm head decondensation (Perreault et al., 1988; Zuelke et al., 2003). This acute phase of glutathione synthesis during the GV to GVBD period coincides exactly with the period in which oocytes and CCs are coupled via GJC (Thomas et al., 2004a,b). Hence, our current findings suggest that an extended cAMP-modulated pre-IVM treatment leads to beneficial accumulation of GSH in the oocyte by prolonging CC-oocyte GJC. This is further supported by the observation that GSH accumulation in the oocyte is only prevented when GJC is blocked in the first half (GV–MI), but not when blocked in the second half (MI–MII), of oocyte maturation (Ozawa et al., 2010). Whilst it seems likely that this would be mediated by direct gap-junctional transfer of glutathione itself from CCs to the oocyte, with the current results, we cannot exclude

the possibility that CCs are providing a critical signal and/or metabolite via GJC, which leads the oocyte itself to synthesize additional glutathione.

The oocyte and zygote are particularly sensitive to damage by ROS and one of their principal antioxidant defences is GSH, allowing the conversion of H<sub>2</sub>O<sub>2</sub> to water. Accordingly, increasing intra-oocyte GSH by cAMP-mediated pre-IVM suppressed oocyte H<sub>2</sub>O<sub>2</sub>, which in turn was negated by inhibition of glutathione synthesis during this period. This provides strong evidence that cAMP-mediated pre-IVM provides an important mechanism for oocyte defence against ROS. It would be expected that removing this defence mechanism would adversely affect oocyte quality, and indeed that is what we observed, in the form of reduced pre-implantation embryo development when oocyte GSH accumulation was prevented in just the 4 h pre-IVM window.

This study shows that extending the duration of cAMP-mediated pre-IVM, to approximate a large part of the GV-GVBD interval, leads to improvements in subsequent oocyte quality. This adds to the growing body of evidence that cAMP-mediated pre-IVM/IVM has great benefit to the oocyte in terms of its capacity to support preimplantation embryo development (Gilchrist, 2011). Such IVM approaches are intended to better simulate *in vitro*, as close as possible, the natural process of oocyte maturation *in vivo*. A fundamental mode of action of cAMP-mediated pre-IVM systems appears to be the retention of CC-oocyte gap-junctional coupling during the critical first half of oocyte meiosis *in vitro*. This enhanced functional CC-oocyte coupling affects oocyte chromatin remodeling and transcription (Luciano *et al.*, 2011; Franciosi *et al.*, 2014), oocyte metabolism (Zeng *et al.*, 2013, 2014), and accumulation of intra-oocyte GSH (current study). As a result of prolonging GJC in COCs, GSH accumulates in the oocyte providing essential protection against oxidative stress. This provides further support to the notion that the appropriate functioning of CCs is required to provide critical metabolites to the oocyte that are required for healthy preimplantation embryo development. Given that the current lower success rate of clinical IVM is the primary impediment to its uptake, application of this simple cAMP-mediated pre-IVM technique stands to bring important benefit if applied to human ART.

## Acknowledgements

We would like to thank all members of the Oocyte Biology and Early Developmental Group at the University of Adelaide. Bull sperm was gifted by SEMEX Australia Pty Ltd and bovine ovaries were gifted by Thomas Foods (Murray Bridge, SA, Australia).

## Authors' roles

The study was jointly designed and funded by RBG and JGT. H.J.L. performed all experiments with assistance from MLSM (GSH and H<sub>2</sub>O<sub>2</sub> assays), X.Q.W. (oocyte maturation, embryology and differential staining experiments) and S.S. (GJC assay). H.J.L., J.G.T. and R.B.G. wrote the manuscript which was edited and approved by all authors.

## Funding

This work was supported by grants and fellowships from the National Health and Medical Research Council of Australia (1007551, 627007, 1008137, 1023210) and by scholarships from the Chinese Scholarship Council (CSC) awarded to H.J.L. and the Japanese Society for the

Promotion of Science Postdoctoral Fellowship for Research Abroad awarded to S.S. The Fluoview FV10i confocal microscope was purchased as part of the Sensing Technologies for Advanced Reproductive Research (STARR) facility, funded by the South Australian Premier's Science and Research Fund. We acknowledge partial support from the Australian Research Council Centre of Excellence for Nanoscale BioPhotonics (CE140100003).

## Conflict of interest

None declared.

## References

- Albertini DF, Combelles CM, Benecchi E, Carabatsos MJ. Cellular basis for paracrine regulation of ovarian follicle development. *Reproduction* 2001; **121**:647–653.
- Albuz FK, Sasseville M, Lane M, Armstrong DT, Thompson JG, Gilchrist RB. Simulated physiological oocyte maturation (SPOM): a novel *in vitro* maturation system that substantially improves embryo yield and pregnancy outcomes. *Hum Reprod* 2010; **25**:2999–3011.
- Curnow EC, Ryan J, Saunders D, Hayes ES. Bovine *in vitro* oocyte maturation as a model for manipulation of the gamma-glutamyl cycle and intraoocyte glutathione. *Reprod Fertil Dev* 2008; **20**:579–588.
- Curnow EC, Ryan JP, Saunders DM, Hayes ES. Developmental potential of bovine oocytes following IVM in the presence of glutathione ethyl ester. *Reprod Fertil Dev* 2010; **22**:597–605.
- Dekel N, Galiani D, Sherizly I. Dissociation between the inhibitory and the stimulatory action of cAMP on maturation of rat oocytes. *Mol Cell Endocrinol* 1988; **56**:115–121.
- de Matos DG, Furnus CC. The importance of having high glutathione (GSH) level after bovine *in vitro* maturation on embryo development effect of beta-mercaptoethanol, cysteine and cystine. *Theriogenology* 2000; **53**:761–771.
- de Matos DG, Furnus CC, Moses DF, Baldassarre H. Effect of cysteamine on glutathione level and developmental capacity of bovine oocyte matured *in vitro*. *Mol Reprod Dev* 1995; **42**:432–436.
- de Matos DG, Furnus CC, Moses DF, Martinez AG, Matkovic M. Stimulation of glutathione synthesis of *in vitro* matured bovine oocytes and its effect on embryo development and freezability. *Mol Reprod Dev* 1996; **45**:451–457.
- de Matos DG, Furnus CC, Moses DF. Glutathione synthesis during *in vitro* maturation of bovine oocytes: role of cumulus cells. *Biol Reprod* 1997; **57**:1420–1425.
- de Matos DG, Gasparrini B, Pasqualini SR, Thompson JG. Effect of glutathione synthesis stimulation during *in vitro* maturation of ovine oocytes on embryo development and intracellular peroxide content. *Theriogenology* 2002; **57**:1443–1451.
- Edwards RG. Maturation *in vitro* of mouse, sheep, cow, pig, rhesus monkey and human ovarian oocytes. *Nature* 1965; **208**:349–351.
- Franciosi F, Cotichio G, Lodde V, Tessaro I, Modena SC, Fadini R, Dal Canto M, Renzini MM, Albertini DF, Luciano AM. Natriuretic peptide precursor C delays meiotic resumption and sustains gap junction-mediated communication in bovine cumulus-enclosed oocytes. *Biol Reprod* 2014; **91**:61.
- Franco R, Cidlowski JA. Apoptosis and glutathione: beyond an antioxidant. *Cell Death Differ* 2009; **16**:1303–1314.
- Funahashi H, Cantley TC, Day BN. Synchronization of meiosis in porcine oocytes by exposure to dibutyl cyclic adenosine monophosphate improves developmental competence following *in vitro* fertilization. *Biol Reprod* 1997; **57**:49–53.

- Gardiner CS, Reed DJ. Synthesis of glutathione in the preimplantation mouse embryo. *Arch Biochem Biophys* 1995;**318**:30–36.
- Gilchrist RB. Recent insights into oocyte-follicle cell interactions provide opportunities for the development of new approaches to in vitro maturation. *Reprod Fertil Dev* 2011;**23**:23–31.
- Gilchrist RB, Richani D. Somatic guidance for the oocyte. *Dev Cell* 2013;**27**:603–605.
- Gilchrist RB, Thompson JG. Oocyte maturation: Emerging concepts and technologies to improve developmental potential in vitro. *Theriogenology* 2007;**67**:6–15.
- Gilchrist RB, Smitz JE, Thompson JG. Current status and future trends of the clinical practice of human oocyte in vitro maturation. In Gardner DK, Rizk BRMB, Falcone T (eds). *Human Assisted Reproductive Technology: Future Trends in Laboratory & Clinical Practice*. Cambridge: Cambridge University Press, 2011, 186–198.
- Gilchrist RB, Ritter LJ, Armstrong DT. Oocyte-somatic cell interactions during follicle development in mammals. *Anim Reprod Sci* 2004;**82–83**:431–446.
- Gilchrist RB, Zeng HT, Wang X, Richani D, Smitz J, Thompson JG. Reevaluation and evolution of the simulated physiological oocyte maturation system. *Theriogenology* 2015;**84**:656–657.
- Granot I, Dekel N. Phosphorylation and expression of connexin-43 ovarian gap junction protein are regulated by luteinizing hormone. *J Biol Chem* 1994;**269**:30502–30509.
- Greameau AS, Andreadis N, Fatum M, Craig J, Turner K, McVeigh E, Child T. In vitro maturation or in vitro fertilization for women with polycystic ovaries? A case-control study of 194 treatment cycles. *Fertil Steril* 2012;**98**:355–360.
- Guerin P, El Mouatassim S, Menezo Y. Oxidative stress and protection against reactive oxygen species in the pre-implantation embryo and its surroundings. *Hum Reprod Update* 2001;**7**:175–189.
- Guixue Z, Luciano AM, Coenen K, Gandolfi F, Sirard MA. The influence of cAMP before or during bovine oocyte maturation on embryonic developmental competence. *Theriogenology* 2001;**55**:1733–1743.
- Hussein TS, Thompson JG, Gilchrist RB. Oocyte-secreted factors enhance oocyte developmental competence. *Dev Biol* 2006;**296**:514–521.
- Keelan J, Allen NJ, Antcliffe D, Pal S, Duchon MR. Quantitative imaging of glutathione in hippocampal neurons and glia in culture using monochlorobimane. *J Neurosci Res* 2001;**66**:873–884.
- Lane M, Gardner DK. Differential regulation of mouse embryo development and viability by amino acids. *J Reprod Fertil* 1997;**109**:153–164.
- Luciano AM, Pocar P, Milanese E, Modina S, Rieger D, Lauria A, Gandolfi F. Effect of different levels of intracellular cAMP on the in vitro maturation of cattle oocytes and their subsequent development following in vitro fertilization. *Mol Reprod Dev* 1999;**54**:86–91.
- Luciano AM, Modina S, Vassena R, Milanese E, Lauria A, Gandolfi F. Role of intracellular cyclic adenosine 3',5'-monophosphate concentration and oocyte-cumulus cells communications on the acquisition of the developmental competence during in vitro maturation of bovine oocyte. *Biol Reprod* 2004;**70**:465–472.
- Luciano AM, Franciosi F, Modina SC, Lodde V. Gap junction-mediated communications regulate chromatin remodeling during bovine oocyte growth and differentiation through cAMP-dependent mechanism(s). *Biol Reprod* 2011;**85**:1252–1259.
- Macalodowie A, Wang YA, Chughtai AA, Sullivan EA. *Assisted Reproductive Technology in Australia and New Zealand 2012*. Sydney: National Perinatal Epidemiology and Statistics Unit, the University of New South Wales, 2014.
- Market-Velker BA, Zhang L, Magri LS, Bonvissuto AC, Mann MR. Dual effects of superovulation: loss of maternal and paternal imprinted methylation in a dose-dependent manner. *Hum Mol Genet* 2010;**19**:36–51.
- Mattioli M, Galeati G, Barboni B, Seren E. Concentration of cyclic AMP during the maturation of pig oocytes in vivo and in vitro. *J Reprod Fertil* 1994;**100**:403–409.
- Mori T, Amano T, Shimizu H. Roles of gap junctional communication of cumulus cells in cytoplasmic maturation of porcine oocytes cultured in vitro. *Biol Reprod* 2000;**62**:913–919.
- Nagai T. The improvement of in vitro maturation systems for bovine and porcine oocytes. *Theriogenology* 2001;**55**:1291–1301.
- Norris RP, Ratzan WJ, Freudzon M, Mehlmann LM, Krall J, Movsesian MA, Wang H, Ke H, Nikolaev VO, Jaffe LA. Cyclic GMP from the surrounding somatic cells regulates cyclic AMP and meiosis in the mouse oocyte. *Development* 2009;**136**:1869–1878.
- Ortega-Hrepich C, Stoop D, Guzman L, Van Landuyt L, Tournaye H, Smitz J, De Vos M. A “freeze-all” embryo strategy after in vitro maturation: a novel approach in women with polycystic ovary syndrome? *Fertil Steril* 2013;**100**:1002–1007.
- Ozawa M, Nagai T, Somfai T, Nakai M, Maedomari N, Miyazaki H, Kaneko H, Noguchi J, Kikuchi K. Cumulus cell-enclosed oocytes acquire a capacity to synthesize GSH by FSH stimulation during in vitro maturation in pigs. *J Cell Physiol* 2010;**222**:294–301.
- Perreault SD, Barbee RR, Slott VL. Importance of glutathione in the acquisition and maintenance of sperm nuclear decondensing activity in maturing hamster oocytes. *Dev Biol* 1988;**125**:181–186.
- Prentice-Biensch JR, Singh J, Alfoteisy B, Anzar M. A simple and high-throughput method to assess maturation status of bovine oocytes: comparison of anti-lamin A/C-DAPI with an aceto-orcein staining technique. *Theriogenology* 2012;**78**:1633–1638.
- Purdey MS, Connaughton HS, Whiting S, Scharfner EP, Monro TM, Thompson JG, Aitken RJ, Abell AD. Boronate probes for the detection of hydrogen peroxide release from human spermatozoa. *Free Radic Biol Med* 2015;**81**:69–76.
- Richani D, Wang X, Zeng HT, Smitz J, Thompson JG, Gilchrist RB. Pre-maturation with cAMP modulators in conjunction with EGF-like peptides during in vitro maturation enhances mouse oocyte developmental competence. *Mol Reprod Dev* 2014;**81**:422–435.
- Rose RD, Gilchrist RB, Kelly JM, Thompson JG, Sutton-McDowall ML. Regulation of sheep oocyte maturation using cAMP modulators. *Theriogenology* 2013;**79**:142–148.
- Sasseville M, Gagnon MC, Guillemette C, Sullivan R, Gilchrist RB, Richard FJ. Regulation of gap junctions in porcine cumulus-oocyte complexes: contributions of granulosa cell contact, gonadotropins, and lipid rafts. *Mol Endocrinol* 2009;**23**:700–710.
- Seggers J, Haadsma ML, La Bastide-Van Gemert S, Heineman MJ, Middelburg KJ, Roseboom TJ, Schendelaar P, Van den Heuvel ER, Hadders-Algra M. Is ovarian hyperstimulation associated with higher blood pressure in 4-year-old IVF offspring? Part I: multivariable regression analysis. *Hum Reprod* 2014;**29**:502–509.
- Shu YM, Zeng HT, Ren Z, Zhuang GL, Liang XY, Shen HW, Yao SZ, Ke PQ, Wang NN. Effects of cilostamide and forskolin on the meiotic resumption and embryonic development of immature human oocytes. *Hum Reprod* 2008;**23**:504–513.
- Sirois J, Fortune JE. Ovarian follicular dynamics during the estrous cycle in heifers monitored by real-time ultrasonography. *Biol Reprod* 1988;**39**:308–317.
- Smitz JE, Thompson JG, Gilchrist RB. The promise of in vitro maturation in assisted reproduction and fertility preservation. *Semin Reprod Med* 2011;**29**:24–37.
- Spits C, Guzman L, Mertzaniadou A, Jacobs K, Ortega-Hrepich C, Gilchrist RB, Thompson JG, De Vos M, Smitz J, Sermon K. Chromosome constitution of human embryos generated after in vitro maturation including 3-isobutyl-1-methylxanthine in the oocyte collection medium. *Hum Reprod* 2015;**30**:653–663.
- Sudiman J, Ritter LJ, Feil DK, Wang X, Chan K, Mottershead DG, Robertson DM, Thompson JG, Gilchrist RB. Effects of differing oocyte-secreted factors during mouse in vitro maturation on subsequent embryo and fetal development. *J Assist Reprod Genet* 2014;**31**:295–306.

- Sugimura S, Akai T, Hashiyada Y, Somfai T, Inaba Y, Hirayama M, Yamanouchi T, Matsuda H, Kobayashi S, Aikawa Y et al. Promising system for selecting healthy in vitro-fertilized embryos in cattle. *PLoS ONE* 2012;**7**:e36627.
- Sugimura S, Ritter LJ, Sutton-McDowall ML, Mottershead DG, Thompson JG, Gilchrist RB. Amphiregulin co-operates with bone morphogenetic protein 15 to increase bovine oocyte developmental competence: effects on gap junction-mediated metabolite supply. *Mol Hum Reprod* 2014;**20**:499–513.
- Sutovsky P, Schatten G. Depletion of glutathione during bovine oocyte maturation reversibly blocks the decondensation of the male pronucleus and pronuclear apposition during fertilization. *Biol Reprod* 1997;**56**:1503–1512.
- Takeo T, Horikoshi Y, Nakao S, Sakoh K, Ishizuka Y, Tsutsumi A, Fukumoto K, Kondo T, Haruguchi Y, Takeshita Y et al. Cysteine analogs with a free thiol group promote fertilization by reducing disulfide bonds in the zona pellucida of mice. *Biol Reprod* 2015;**92**:90.
- Thomas RE, Armstrong DT, Gilchrist RB. Bovine cumulus cell-oocyte gap junctional communication during in vitro maturation in response to manipulation of cell-specific cyclic adenosine 3',5'-monophosphate levels. *Biol Reprod* 2004a;**70**:548–556.
- Thomas RE, Thompson JG, Armstrong DT, Gilchrist RB. Effect of specific phosphodiesterase isoenzyme inhibitors during in vitro maturation of bovine oocytes on meiotic and developmental capacity. *Biol Reprod* 2004b;**71**:1142–1149.
- Thompson JG, Lane M, Gilchrist RB. Metabolism of the bovine cumulus-oocyte complex and influence on subsequent developmental competence. *Soc Reprod Fertil Suppl* 2007;**64**:179–190.
- Tsafiri A, Zor U, Lamprech SA, Lindner HR. In-vitro induction of meiotic division in follicle-enclosed rat oocytes by Lh, cyclic amp and prostaglandin-E2. *J Reprod Fertil* 1972;**31**:39–50.
- Walls ML, Hunter T, Ryan JP, Keelan JA, Nathan E, Hart RJ. In vitro maturation as an alternative to standard in vitro fertilization for patients diagnosed with polycystic ovaries: a comparative analysis of fresh, frozen and cumulative cycle outcomes. *Hum Reprod* 2015;**30**:88–96.
- Yogo K, Ogawa T, Akiyama M, Ishida-Kitagawa N, Sasada H, Sato E, Takeya T. PKA implicated in the phosphorylation of Cx43 induced by stimulation with FSH in rat granulosa cells. *J Reprod Dev* 2006;**52**:321–328.
- Yoshimura Y, Nakamura Y, Oda T, Ando M, Ubukata Y, Karube M, Koyama N, Yamada H. Induction of meiotic maturation of follicle-enclosed oocytes of rabbits by a transient increase followed by an abrupt decrease in cyclic AMP concentration. *J Reprod Fertil* 1992;**95**:803–812.
- Zeng HT, Ren Z, Guzman L, Wang X, Sutton-McDowall ML, Ritter LJ, De Vos M, Smitz J, Thompson JG, Gilchrist RB. Heparin and cAMP modulators interact during pre-in vitro maturation to affect mouse and human oocyte meiosis and developmental competence. *Hum Reprod* 2013;**28**:1536–1545.
- Zeng HT, Richani D, Sutton-McDowall ML, Ren Z, Smitz JE, Stokes Y, Gilchrist RB, Thompson JG. Prematuration with cyclic adenosine monophosphate modulators alters cumulus cell and oocyte metabolism and enhances developmental competence of in vitro-matured mouse oocytes. *Biol Reprod* 2014;**91**:47.
- Zuccotti M, Giorgi Rossi P, Martinez A, Garagna S, Forabosco A, Redi CA. Meiotic and developmental competence of mouse antral oocytes. *Biol Reprod* 1998;**58**:700–704.
- Zuelke KA, Jeffay SC, Zucker RM, Perreault SD. Glutathione (GSH) concentrations vary with the cell cycle in maturing hamster oocytes, zygotes, and pre-implantation stage embryos. *Mol Reprod Dev* 2003;**64**:106–112.
